# Supplementary material for: Blue phosphorene on Au(111): theoretical, spectroscopic and diffraction analysis reveal the role of single Au adatoms
Source: Royal Society of Chemistry journal article supplement (doi:10.1039/d4na00192c), 2024-01-01
Supplement: d4na00192c1.pdf [file d4na00192c1.pdf]

# SUPPORTING INFORMATION

## Blue Phosphorene on Au(111): theory, spectroscopy and diffraction reveal the role of single Au adatoms.

Simone Del Puppo<sup>1§</sup>, Pietro Biasin<sup>1</sup>, Alessandro Sala<sup>2\*</sup>, Paola Mantegazza<sup>1#</sup>, Ivan Pasqua<sup>1</sup>, Elena Ghidorsi<sup>1</sup>, Maria Caporali<sup>3</sup>, Andrea Resta<sup>4</sup>, Alessandro Coati<sup>4</sup>, Francesca Genuzio<sup>5</sup>, Tefvik Onur Menteş<sup>5</sup>, Andrea Locatelli<sup>5</sup>, Giovanni Comelli<sup>1,2</sup>, Cristina Africh<sup>2</sup>, Erik Vesselli<sup>1,2</sup>, Maria Peressi<sup>1\*</sup>, Alberto Verdini<sup>2\*</sup>

<sup>1</sup> Department of Physics, University of Trieste, via Valerio 2, 34127 Trieste, Italy

<sup>2</sup> CNR-IOM Materials Foundry, S.S. 14 km 163.5 in AREA Science Park, 34129 Trieste, Italy

<sup>3</sup> CNR-ICCOM, via Madonna del Piano 10, 50019 Sesto Fiorentino, Italy

<sup>4</sup> Synchrotron SOLEIL, L'Orme des Merisiers, Départementale 128, 91190 Saint-Aubin, France

<sup>5</sup> Elettra Sincrotrone Trieste, S.S. 14 km 163.5 in AREA Science Park, 34129 Trieste, Italy

<sup>§</sup> present address: SDG Group Italy, Via Vitruvio 1, 20124 Milan, Italy

<sup>#</sup> present address: School of Chemistry, University of Birmingham, Edgbaston, Birmingham, B15 2TT, UK

<sup>\*</sup> present address: Scuola Internazionale Superiore di Studi Avanzati, via Bonomea 265, 34136 Trieste, Italy

\* Corresponding authors: [sala@iom.cnr.it](mailto:sala@iom.cnr.it), [peressi@units.it](mailto:peressi@units.it), [verdini@iom.cnr.it](mailto:verdini@iom.cnr.it)

### Table of content

**Figure S1: Simulated Au(111) band structure for different slab thickness**

**Figure S2: in-plane reciprocal space map of SXRD**

**Figure S3: Simulated atomic plane distance for different slab thickness**

**Table S1: Atomic coordinates used for SXRD simulation**

### Figure S1

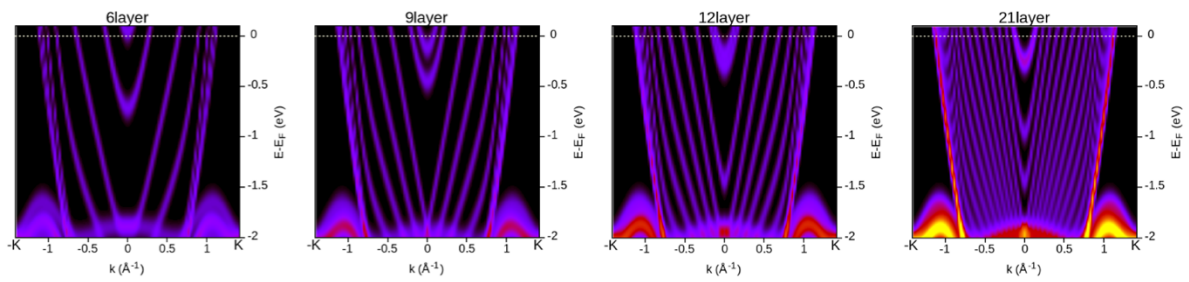

Figure S1 shows the calculated band structure of Au(111) along  $\Gamma$ -K in the reciprocal space as function of electron binding energy for four different slab thickness, 6, 9, 12, and 21 layers. In this binding energy window, 0.0-2.0 eV, the *sp*-bands are dominant, while the stronger Au *d*-band start to appear at the bottom edge. The well-known Shockley surface state of Au(111), located around  $\Gamma$  between Fermi energy and  $\sim 0.5$  eV, becomes evident only for slabs thicker than 12 layers.

**Figure S2**

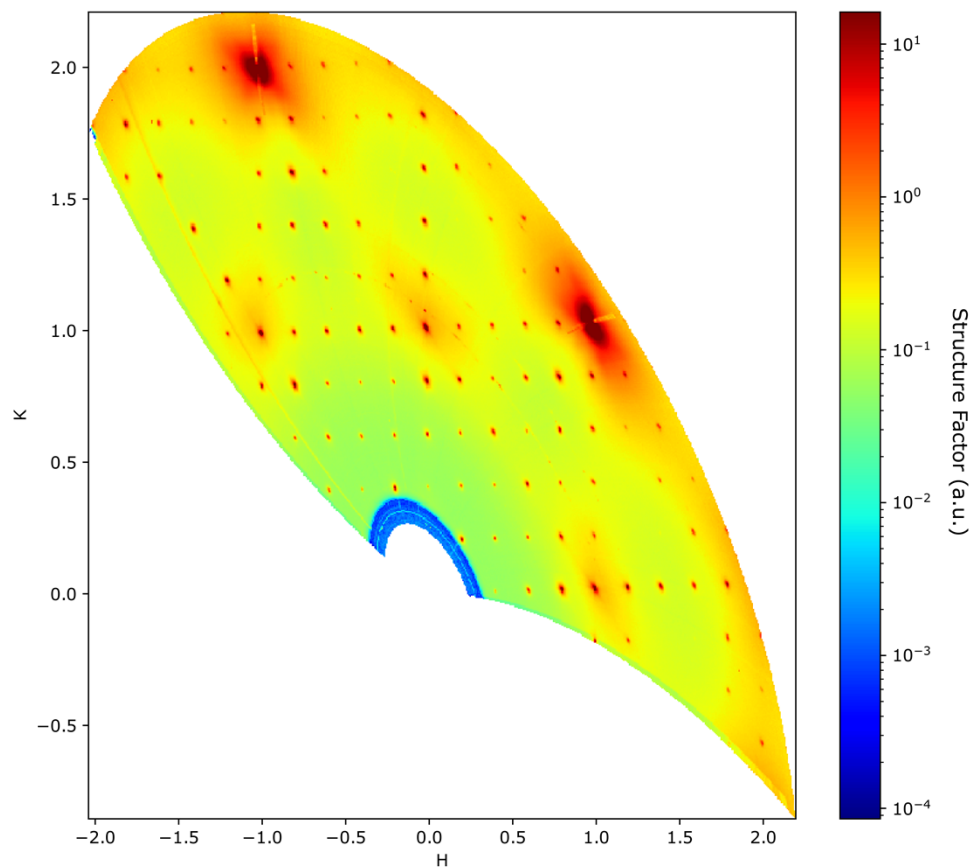

*Figure S2 shows the in-plane reciprocal space map of SXR D performed on BlueP-Au/Au(111), for fixed diffraction index  $L = 0.10$ .*

Figure S3

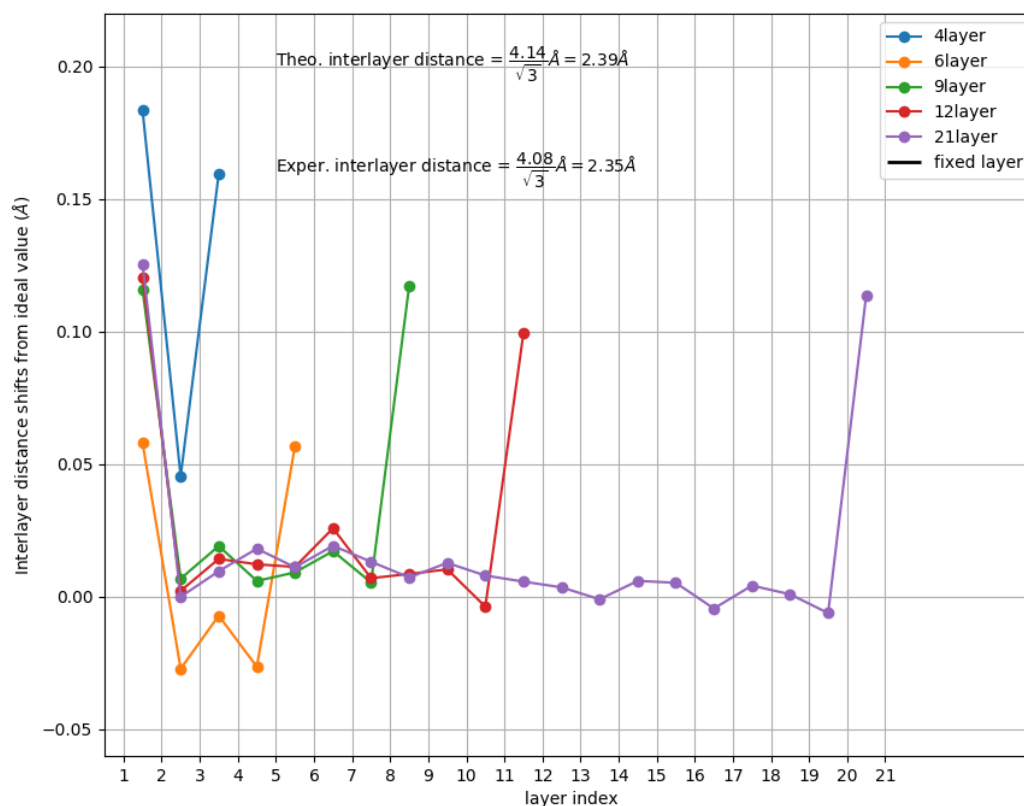

Figure S3 displays the deviations from the ideal value of the distance between atomic planes for different of Au(111) slab thicknesses. The x axis deploys the layer index, i.e. the ordinal number associated with the atomic plane, being 1 the topmost plane. The interplanar distance between  $X^{\text{th}}$  and  $X+1^{\text{th}}$  plane falls between X and X+1 index. Only for slab thicker than 9 layer the interplanar distance between internal planes converges to a constant value. 6-layer slab experiences larger distance variation, although the overall average remains almost unchanged. Conversely, interplanar distances in the 4-layer slab are constantly overestimated, occasionally by more than 0.15 Å.

**Table S1**

| Element | X (Å)   | Y (Å)   | Z (Å)  |
|---------|---------|---------|--------|
| Au      | -5.8439 | 11.8293 | 2.3722 |
| Au      | -2.9009 | 11.8405 | 2.3890 |
| Au      | -0.0004 | 11.8498 | 2.4055 |
| Au      | 2.8991  | 11.8415 | 2.3887 |
| Au      | 5.8424  | 11.8299 | 2.3722 |
| Au      | -0.0012 | 1.7096  | 2.3722 |
| Au      | 2.9462  | 1.7011  | 2.3686 |
| Au      | 5.8766  | 1.7133  | 2.4041 |
| Au      | 8.7701  | 1.7135  | 2.4081 |
| Au      | 11.6992 | 1.7018  | 2.3690 |
| Au      | -1.4827 | 4.2530  | 2.3893 |
| Au      | 1.4798  | 4.2528  | 2.3890 |
| Au      | 4.4220  | 4.2327  | 2.4041 |
| Au      | 7.3233  | 4.2281  | 2.4485 |
| Au      | 10.2243 | 4.2328  | 2.4088 |
| Au      | -2.9397 | 6.7596  | 2.4102 |
| Au      | -0.0015 | 6.7828  | 2.4136 |
| Au      | 2.9382  | 6.7600  | 2.4055 |
| Au      | 5.8690  | 6.7384  | 2.4081 |
| Au      | 8.7778  | 6.7383  | 2.4088 |
| Au      | -4.3820 | 9.2747  | 2.3893 |
| Au      | -1.4506 | 9.2927  | 2.4136 |
| Au      | 1.4491  | 9.2934  | 2.4091 |
| Au      | 4.3807  | 9.2753  | 2.3887 |
| Au      | 7.3234  | 9.2809  | 2.3690 |
| Au      | -4.3466 | 10.9652 | 4.7390 |
| Au      | -1.4434 | 10.9702 | 4.8253 |
| Au      | 1.4414  | 10.9695 | 4.8243 |
| Au      | 4.3447  | 10.9652 | 4.7385 |
| Au      | 7.3229  | 10.9939 | 4.7161 |
| Au      | 1.4633  | 0.8448  | 4.7158 |
| Au      | 4.4040  | 0.8650  | 4.7602 |
| Au      | 7.3223  | 0.8636  | 4.8149 |
| Au      | 10.2420 | 0.8648  | 4.7617 |
| Au      | 13.1824 | 0.8448  | 4.7161 |
| Au      | -0.0010 | 3.4383  | 4.7390 |
| Au      | 2.9511  | 3.3815  | 4.7602 |
| Au      | 5.8724  | 3.3905  | 4.9034 |
| Au      | 8.7725  | 3.3906  | 4.9054 |
| Au      | 11.6952 | 3.3812  | 4.763  |

Atomic coordinates (x;y;z) of the unit cell that delivers the best fit with SXRD data.

|    |         |         |         |
|----|---------|---------|---------|
| Au | -1.4563 | 5.9500  | 4.8273  |
| Au | 1.4549  | 5.9501  | 4.8253  |
| Au | 4.4092  | 5.9094  | 4.8149  |
| Au | 7.3226  | 5.9019  | 4.9054  |
| Au | 10.2362 | 5.9098  | 4.8182  |
| Au | -2.8991 | 8.4490  | 4.8273  |
| Au | -0.0007 | 8.4563  | 4.9025  |
| Au | 2.8968  | 8.4487  | 4.8243  |
| Au | 5.8699  | 8.4374  | 4.7617  |
| Au | 8.7758  | 8.4377  | 4.7623  |
| Au | 7.3440  | 12.7212 | 7.0095  |
| Au | 2.8604  | 0.0027  | 7.0288  |
| Au | 5.8302  | 0.0146  | 7.1280  |
| Au | 8.8145  | 0.0143  | 7.1277  |
| Au | 11.7851 | 0.0025  | 7.0292  |
| Au | 13.2133 | 2.4754  | 7.0299  |
| Au | 1.4325  | 2.4758  | 7.0288  |
| Au | 4.3373  | 2.5040  | 7.1366  |
| Au | 7.3224  | 2.5261  | 7.1679  |
| Au | 10.3080 | 2.5038  | 7.1378  |
| Au | 11.7176 | 5.0414  | 7.1300  |
| Au | -0.0010 | 4.9995  | 7.1207  |
| Au | 2.9277  | 5.0418  | 7.1280  |
| Au | 5.8489  | 5.0784  | 7.1679  |
| Au | 8.7964  | 5.0786  | 7.1693  |
| Au | 10.2248 | 7.6271  | 7.1300  |
| Au | -1.4858 | 7.5990  | 7.1395  |
| Au | 1.4828  | 7.5991  | 7.1383  |
| Au | 4.4196  | 7.6265  | 7.1277  |
| Au | 7.3223  | 7.6750  | 7.1379  |
| Au | 8.7505  | 10.2052 | 7.0299  |
| Au | -2.9947 | 10.1846 | 7.1207  |
| Au | -0.0015 | 10.1698 | 7.1383  |
| Au | 2.9920  | 10.1842 | 7.1193  |
| Au | 5.8948  | 10.2050 | 7.0292  |
| P  | -0.0013 | 4.7302  | 8.8658  |
| P  | 1.6099  | 7.5259  | 8.9964  |
| P  | 3.2254  | 10.3190 | 8.8643  |
| P  | -0.0012 | 10.3165 | 8.9964  |
| P  | -3.2281 | 10.3190 | 8.8658  |
| P  | -1.6125 | 7.5258  | 8.9976  |
| P  | 1.7404  | 9.4616  | 11.2616 |

|    |         |         |         |
|----|---------|---------|---------|
| P  | -0.0010 | 6.4452  | 11.2623 |
| P  | -1.7425 | 9.4618  | 11.2623 |
| P  | 4.0928  | 2.3631  | 8.8864  |
| P  | 7.3224  | 2.3658  | 9.0275  |
| P  | 10.5519 | 2.3631  | 8.8876  |
| P  | 5.7101  | 5.1583  | 9.0276  |
| P  | 8.9348  | 5.1584  | 9.0288  |
| P  | 7.3224  | 7.9567  | 8.8877  |
| P  | 9.0683  | 3.2191  | 11.2898 |
| P  | 7.3220  | 6.2438  | 11.2898 |
| P  | 5.5759  | 3.2193  | 11.2890 |
| Au | 2.0784  | 3.6025  | 9.4810  |
| Au | 3.6587  | 6.3429  | 9.7289  |
| Au | 5.2417  | 9.0816  | 9.4809  |
| Au | 12.5664 | 3.6027  | 9.4819  |
| Au | -3.6613 | 6.3429  | 9.7307  |
| Au | 9.4033  | 9.0813  | 9.4819  |
| Au | 3.1619  | 12.6838 | 9.4809  |
| Au | -0.0014 | 12.6823 | 9.7288  |
| Au | -3.1648 | 12.6839 | 9.4810  |
| Au | 0.0000  | 0.0000  | 0.0000  |
| Au | -1.4648 | 2.5370  | 0.0000  |
| Au | -2.9295 | 5.0741  | 0.0000  |
| Au | -4.3943 | 7.6111  | 0.0000  |
| Au | -5.8591 | 10.1482 | 0.0000  |
| Au | 2.9295  | 0.0000  | 0.0000  |
| Au | 1.4648  | 2.5370  | 0.0000  |
| Au | -0.0000 | 5.0741  | 0.0000  |
| Au | -1.4648 | 7.6111  | 0.0000  |
| Au | -2.9295 | 10.1482 | 0.0000  |
| Au | 5.8591  | 0.0000  | 0.0000  |
| Au | 4.3943  | 2.5370  | 0.0000  |
| Au | 2.9295  | 5.0741  | 0.0000  |
| Au | 1.4648  | 7.6111  | 0.0000  |
| Au | -0.0000 | 10.1482 | 0.0000  |
| Au | 8.7886  | 0.0000  | 0.0000  |
| Au | 7.3238  | 2.5370  | 0.0000  |
| Au | 5.8590  | 5.0741  | 0.0000  |
| Au | 4.3943  | 7.6111  | 0.0000  |
| Au | 2.9295  | 10.1482 | 0.0000  |
| Au | 11.7181 | 0.0000  | 0.0000  |
| Au | 10.2533 | 2.5370  | 0.0000  |
| Au | 8.7886  | 5.0741  | 0.0000  |
| Au | 7.3238  | 7.6111  | 0.0000  |
| Au | 5.8590  | 10.1482 | 0.0000  |
| Au | 13.1829 | 0.8457  | -2.3919 |
| Au | 11.7181 | 3.3827  | -2.3919 |
| Au | 10.2533 | 5.9198  | -2.3919 |

|    |         |         |         |
|----|---------|---------|---------|
| Au | 8.7886  | 8.4568  | -2.3919 |
| Au | 7.3238  | 10.9939 | -2.3919 |
| Au | 1.4648  | 0.8457  | -2.3919 |
| Au | -0.0000 | 3.3827  | -2.3919 |
| Au | -1.4648 | 5.9198  | -2.3919 |
| Au | -2.9295 | 8.4568  | -2.3919 |
| Au | -4.3943 | 10.9939 | -2.3919 |
| Au | 4.3943  | 0.8457  | -2.3919 |
| Au | 2.9295  | 3.3827  | -2.3919 |
| Au | 1.4648  | 5.9198  | -2.3919 |
| Au | -0.0000 | 8.4568  | -2.3919 |
| Au | -1.4648 | 10.9939 | -2.3919 |
| Au | 7.3238  | 0.8457  | -2.3919 |
| Au | 5.8590  | 3.3827  | -2.3919 |
| Au | 4.3943  | 5.9198  | -2.3919 |
| Au | 2.9295  | 8.4568  | -2.3919 |
| Au | 1.4648  | 10.9939 | -2.3919 |
| Au | 10.2533 | 0.8457  | -2.3919 |
| Au | 8.7886  | 3.3827  | -2.3919 |
| Au | 7.3238  | 5.9198  | -2.3919 |
| Au | 5.8590  | 8.4568  | -2.3919 |
| Au | 4.3943  | 10.9939 | -2.3919 |
| Au | 11.7181 | 1.6914  | -4.7839 |
| Au | 10.2533 | 4.2284  | -4.7839 |
| Au | 8.7886  | 6.7654  | -4.7839 |
| Au | 7.3238  | 9.3025  | -4.7839 |
| Au | 5.8590  | 11.8395 | -4.7839 |
| Au | 0.0000  | 1.6914  | -4.7839 |
| Au | -1.4648 | 4.2284  | -4.7839 |
| Au | -2.9295 | 6.7654  | -4.7839 |
| Au | -4.3943 | 9.3025  | -4.7839 |
| Au | -5.8591 | 11.8395 | -4.7839 |
| Au | 2.9295  | 1.6914  | -4.7839 |
| Au | 1.4648  | 4.2284  | -4.7839 |
| Au | 0.0000  | 6.7654  | -4.7839 |
| Au | -1.4648 | 9.3025  | -4.7839 |
| Au | -2.9295 | 11.8395 | -4.7839 |
| Au | 5.8591  | 1.6914  | -4.7839 |
| Au | 4.3943  | 4.2284  | -4.7839 |
| Au | 2.9295  | 6.7654  | -4.7839 |
| Au | 1.4648  | 9.3025  | -4.7839 |
| Au | -0.0000 | 11.8395 | -4.7839 |
| Au | 8.7886  | 1.6914  | -4.7839 |
| Au | 7.3238  | 4.2284  | -4.7839 |
| Au | 5.8590  | 6.7654  | -4.7839 |
| Au | 4.3943  | 9.3025  | -4.7839 |
| Au | 2.9295  | 11.8395 | -4.7839 |
